# Supplementary material
Source: PubMed Central journal article supplement (PMC2040422)
Supplement: pnas_0609852104_3.pdf [file pnas_0609852104_3.pdf]

|                     |   |   |   |     |
|---------------------|---|---|---|-----|
| <b>Xpress-IRF-1</b> | - | + | + | +   |
| <b>SUMO-1</b>       | - | - | + | +++ |

**IP : anti-Xpress**  
**IB : anti-Ub**

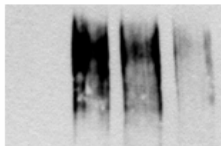

Ub-IRF-1

**IP : anti-Xpress**  
**IB : anti-SUMO-1**

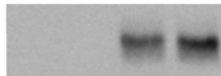

SUMO-IRF-1

**WCL**  
**IB : anti-IRF-1**

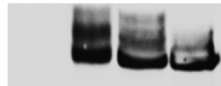

IRF-1
