# Supplementary material
Source: PubMed Central journal article supplement (PMC2040422)

(kDa)

*anti-control*

*anti-SUMO-1*

100 -

75 -

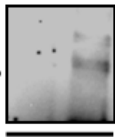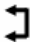

**SUMOylated IRF-1**

**IB: anti-IRF-1**

Supplement: pnas_0609852104_1.pdf [file pnas_0609852104_1.pdf]

**A**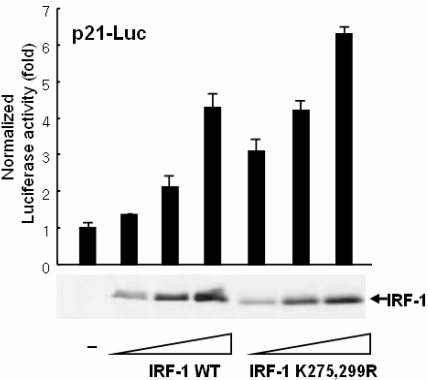**B**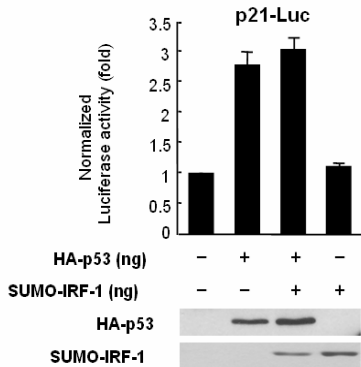

Supplement: pnas_0609852104_4.pdf [file pnas_0609852104_4.pdf]
